# Supplementary material for: A flowerlike FePt/MnO2/GOx-based cascade nanoreactor with sustainable O2 supply for synergistic starvation-chemodynamic anticancer therapy
Source: Royal Society of Chemistry journal article supplement (doi:10.1039/d1tb01539g), 2021-01-01
Supplement: d1tb01539g1.pdf [file d1tb01539g1.pdf]

## Supporting information

# Flowerlike FePt/MnO<sub>2</sub>/GOx-Based Cascade Nanoreactor with Sustainable O<sub>2</sub> Supplying for Synergistic Starvation-Chemodynamic Anticancer Therapy

Yunkai Kou,<sup>a</sup> Zhichao Dai,<sup>\*a</sup> Ping Cui,<sup>a</sup> Zunfu Hu,<sup>a</sup> Lu Tian,<sup>a</sup> Feifei Zhang,<sup>a</sup> Haiqiang

Duan,<sup>a</sup> Qiyong Xia,<sup>\*a</sup> Qingyun Liu,<sup>b</sup> Xiuwen Zheng<sup>\*a</sup>

<sup>a</sup>Key Laboratory of Functional Nanomaterials & Technology in Universities of Shandong, School of Chemistry & Chemical Engineering, Linyi University, Linyi 276005, P. R. China

<sup>b</sup>College of Chemical and Environmental Engineering, Shandong University of Science and Technology, Qingdao 266590, P. R. China

\*Corresponding authors.

Tel./Fax: +86-539-7258629

E-mail: zc\_dai@126.com (Z. D.); xiaqiyong@163.com (Q. X.);

zhengxiuwen@lyu.edu.cn (X. Z.).

**Physical measurements.** Transmission electron microscopy(TEM) images, high-resolution TEM (HRTEM) images and energy dispersive spectroscopy (EDS) spectra were determined on a JEOL-2100 transmission electron microscope. High-angle annular dark-field (HAADF)-scanning transmission electron microscopy (STEM) coupled with EDS elemental mapping was conducted on a JEOL ARM-200F field emission transmission electron microscope. Dynamic light scattering (DLS) and Zeta potential were detected by Nano-ZS (Malvern). The content of iron, platinum, and manganese was determined on a Thermo Fisher inductively coupled plasma (ICP) optical emission spectrometry (iCAP Qc). The UV-vis spectra and the fluorescent spectra were carried out on a NANO DROP 2000 spectrophotometer and an Edinburgh FS5 spectrophotometer, respectively.

**Statistical Analysis.** Statistical analysis was obtained by Student's t-test for three/four groups. The two-way ANOVA was used to evaluate the data of tumor growth using the Origin software. All results were expressed as the mean  $\pm$  SD. A value of  $p < 0.05$  was considered statistically significant.

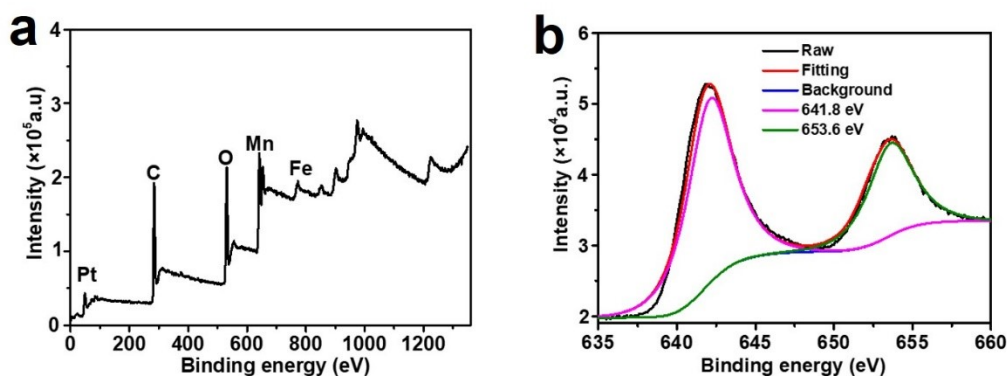

**Fig. S1** XPS analysis of BGMFP. a) XPS spectra of BGMFP. b) XPS high-resolution scans of Mn2p peaks in BGMFP.

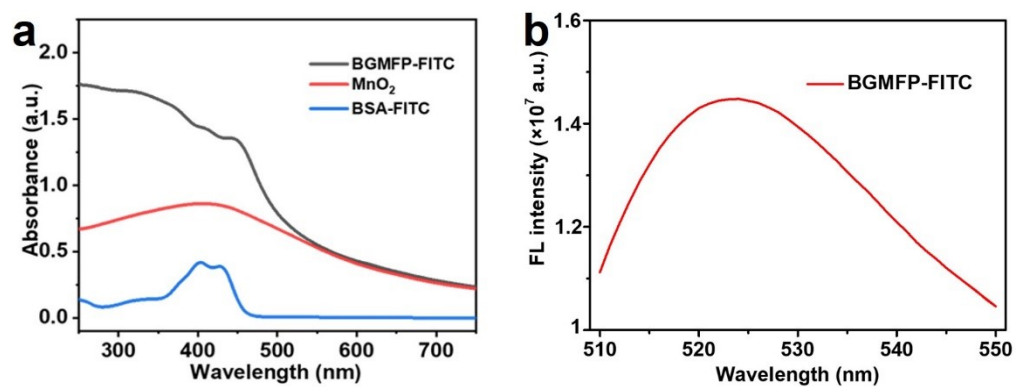

**Fig. S2** The UV-vis absorption (a) and fluorescence (b) spectra of BGMFP-FITC.

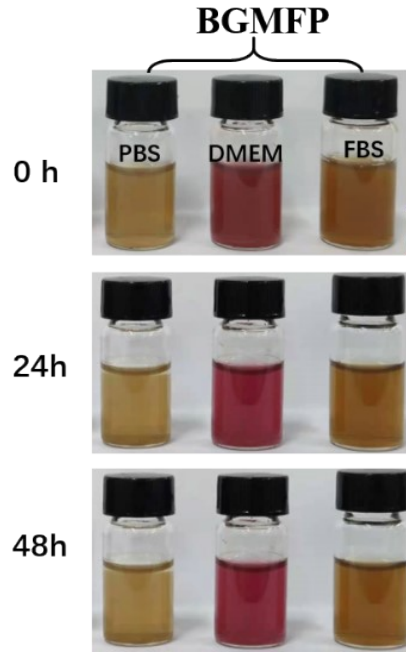

**Fig. S3** The stability of BGMFP in PBS, DMEM and fetal bovine serum (FBS) after 48 h.

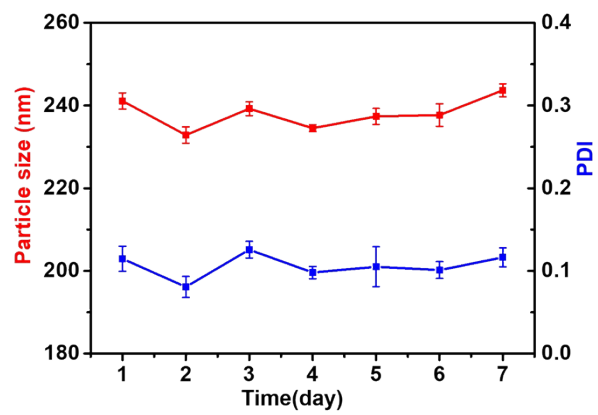

**Fig. S4** The changes of hydrodynamic size and PDI of BGMFP size distribution and PDI changes of BGMFP within 7 days.

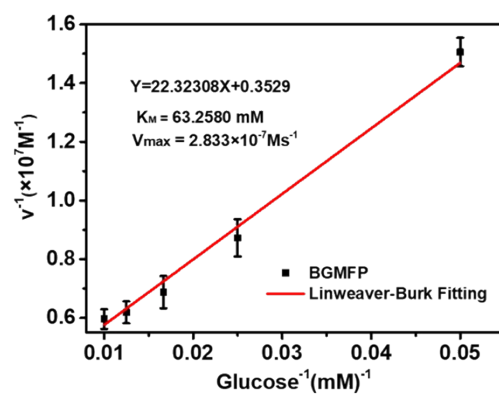

**Fig. S5.** Lineweaver-Burk plotting of BGMFP.

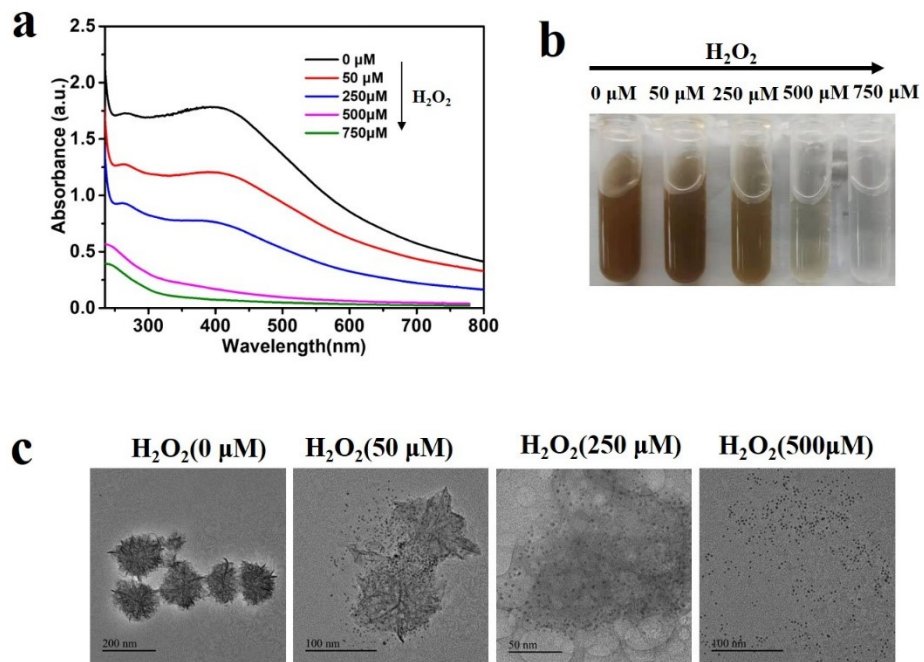

**Fig. S6** The UV-Vis absorption spectra (a), digital photographs (b) and TEM images (c) of BGMFP(100  $\mu\text{g/mL}$ ) after treatment with  $\text{H}_2\text{O}_2$  at different concentrations of pH 5.8.

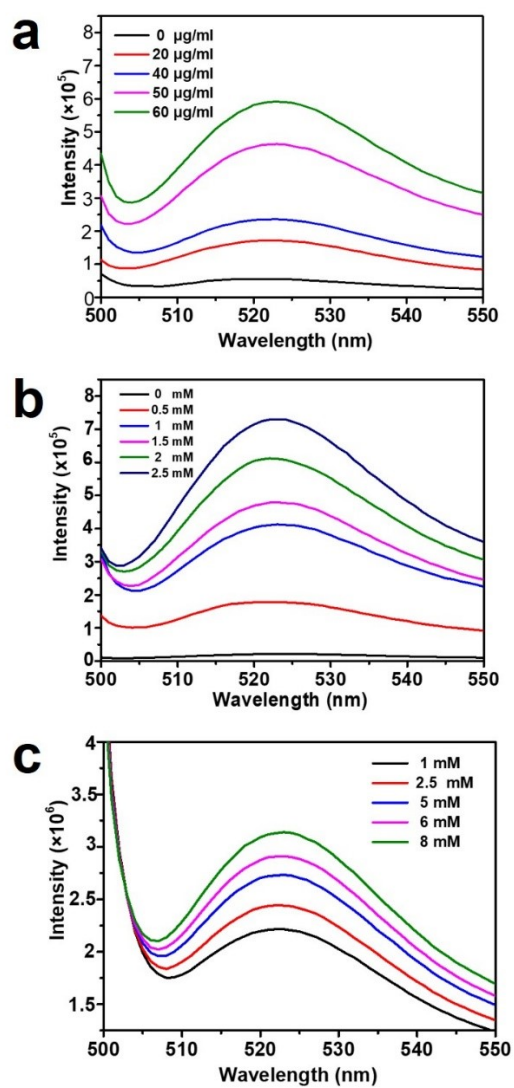

**Fig. S7** The fluorescence spectra of DCFH with the increase of BGMFP (a),  $\text{H}_2\text{O}_2$  (b) and glucose (c) content.



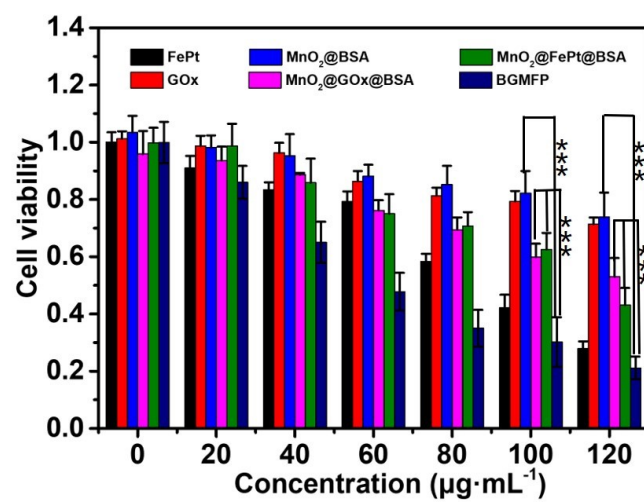

**Fig. S8** The viability of 4T1 cells in different groups under hypoxia conditions. \* $p < 0.05$ , \*\* $p < 0.01$ , \*\*\* $p < 0.005$  (t-test).

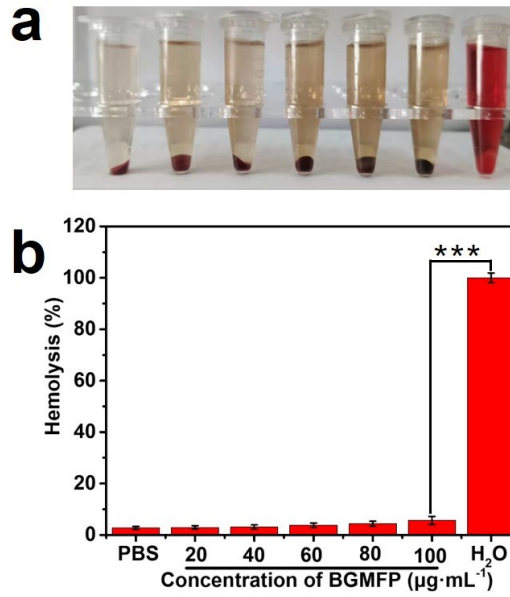

**Fig. S9** (a) Photograph of RBC suspensions after treatment with various concentrations of BGMFP. The RBC suspensions treated with PBS and H<sub>2</sub>O were set as negative control and positive control, respectively. (b) Corresponding hemolysis rates of the RBC samples in (a). (\*\*\*) $p < 0.005$ ).

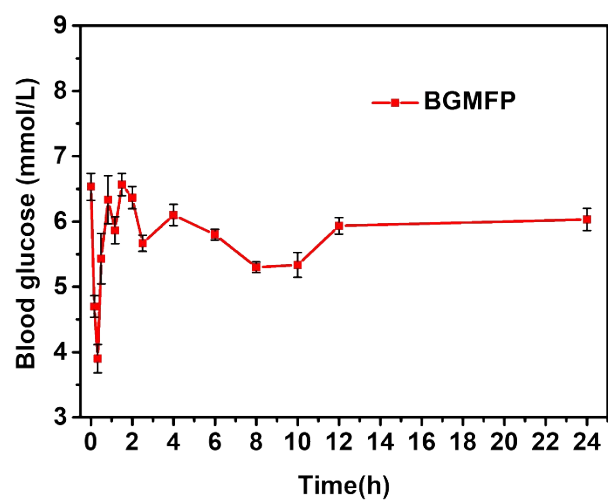

**Fig. S10** The variations of blood glucose concentration in mice within 24 h after injection with BGMFP via tail vein.

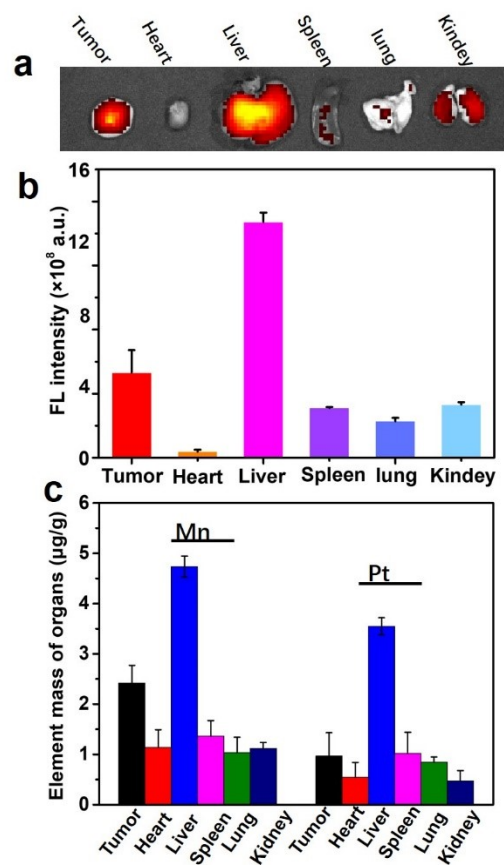

**Fig. S11** (a) The fluorescence images of tumor and main organs derived from the mice at 108 h post injection. (b) The corresponding fluorescence intensity of (a). (c) The Pt/Mn level of tumor and main organs derived from the mice after 15 d treatment.

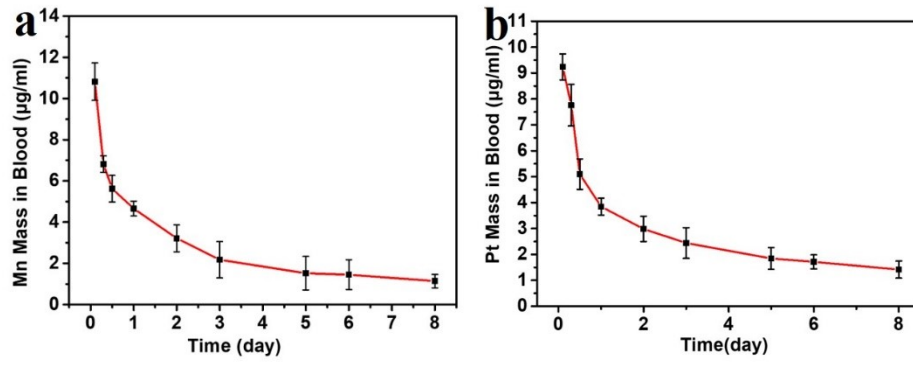

**Fig. S12** The content of Mn (a) and Pt (b) in mice blood after the injection of BGMFP via tail vein.

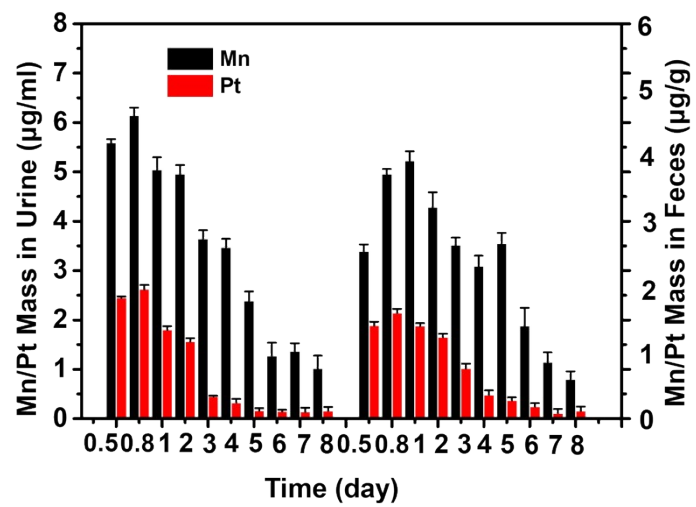

**Fig. S13** Mn/Pt Content in feces and urine within 8 days.

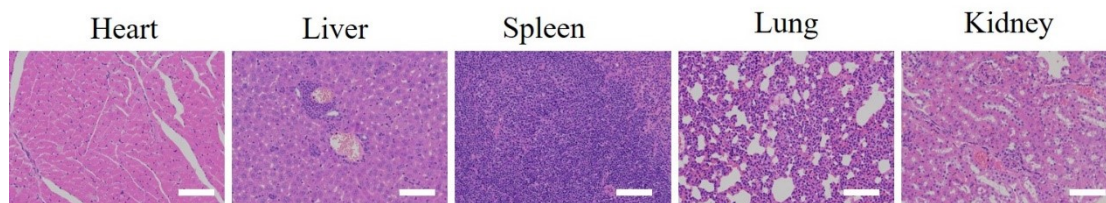

**Fig. S14** H&E stained images of dissected major organs derived from the mice after treatment with BGMFP for 15 days (scale bars: 100  $\mu\text{m}$ ).
